# Supplementary material for: Prediction of the Prognosis Based on Chromosomal Instability-Related DNA Methylation Patterns of ELOVL2 and UBAC2 in PTCs
Source: PubMed Central journal article supplement — Mol Ther Nucleic Acids. 2019 Oct 7;18:650–60. doi: 10.1016/j.omtn.2019.09.027 (PMC6906861; doi:10.1016/j.omtn.2019.09.027), 2019-10-07
Supplement: mmc1.pdf [file mmc1.pdf]

OMTN, Volume 18

## Supplemental Information

### **Prediction of the Prognosis Based on Chromosomal Instability-Related DNA Methylation Patterns of *ELOVL2* and *UBAC2* in PTCs**

**Jun Han, Meijun Chen, Qingxiao Fang, Yanqing Zhang, Yihan Wang, Jamaspishvili Esma, and Hong Qiao**

## Supplementary Figures

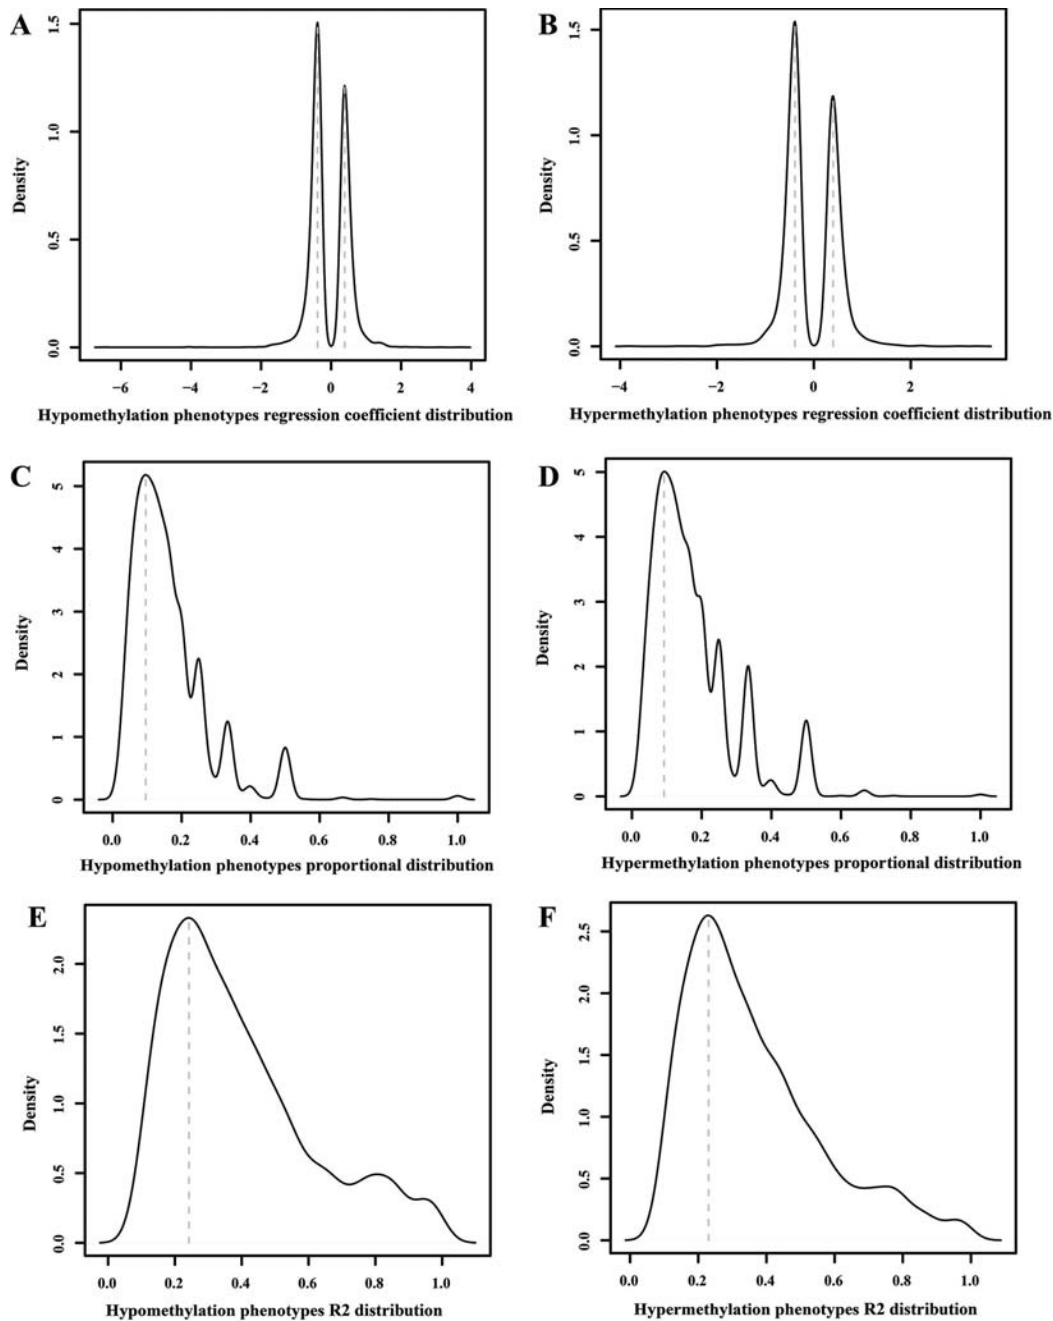

**Figure S1. Correlation distribution.** (A) More than 50% of regression coefficient distribution of the hypomethylated sites were negatively related to gene expression. (B) More than 50% of regression coefficient distribution of the hypermethylated sites were negatively related to gene expression. (C) Proportion of the hypomethylated sites significantly related to gene expression, peak value was 9.607311%, 2,035 genes  $\geq 9.607311\%$ , which was 70% of total, 7 of them with 100% proportion. (D) Proportion of the hypermethylated sites significantly related to gene expression, peak value was 9.219488%, 2,082 genes  $\geq 9.219488\%$ , which was 72% of total, 3 of

them with 100% proportion. (E) Distribution of the hypomethylated sites multiple regression correlation coefficient ( $R^2$ ), 1,758 genes  $R^2 > 0.25$ , which was more than 50% of total. (F) Distribution of the hypermethylated sites multiple regression correlation coefficient ( $R^2$ ), 1,694 genes  $R^2 > 0.25$ , which was more than 50% of total.

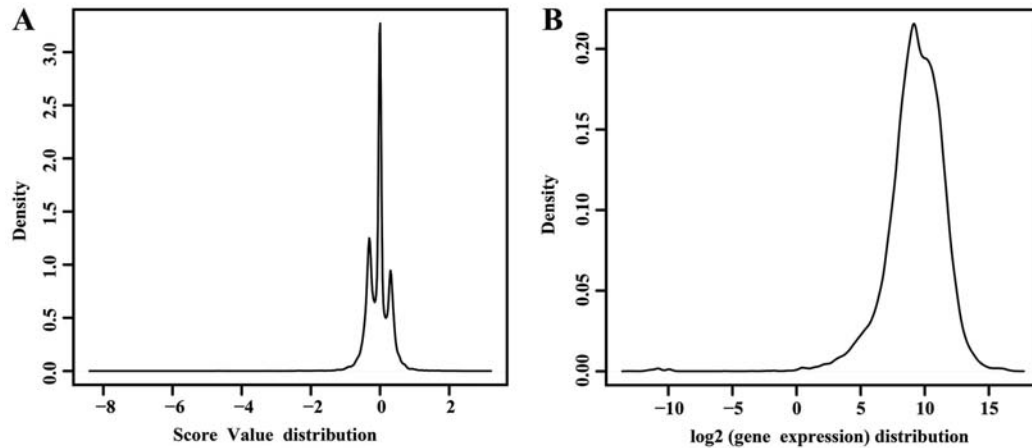

**Figure S2. Data distribution.** (A) The distribution of Score Value is consistent with the normal distribution. (B) The distribution of gene expression is consistent with the normal distribution.

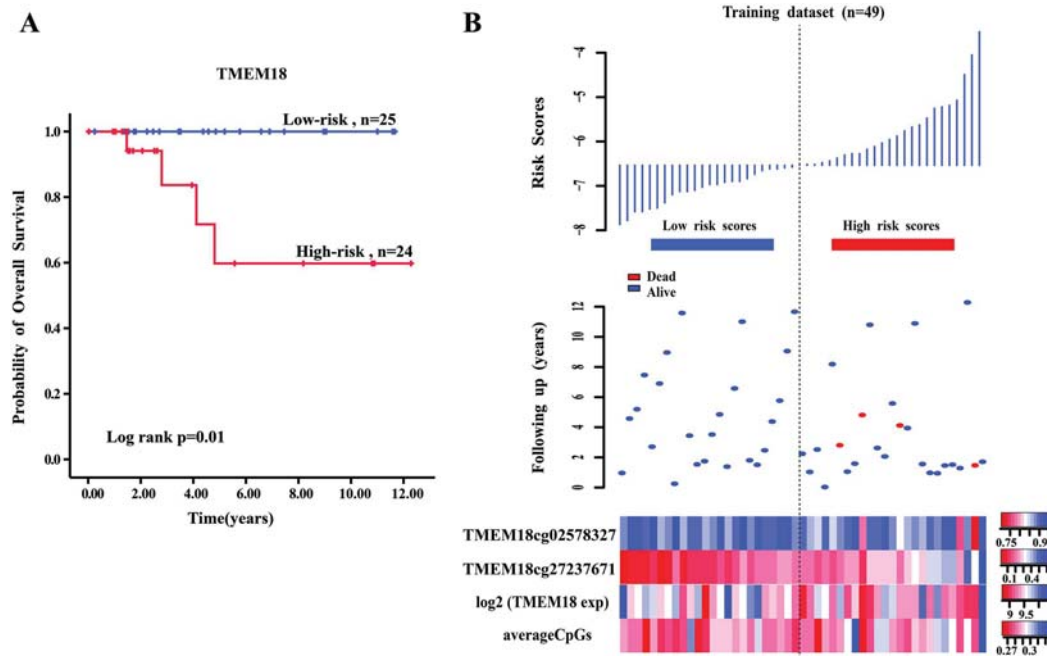

**Figure S3. The *TMEM18* risk score model predicts overall survival of papillary thyroid carcinoma patients in the training dataset.** (A) Kaplan-Meier analysis for overall survival of patients with high-risk or low-risk scores. P value was calculated using the two-sided log-rank test. (B) DNA methylation pattern, expression level and average methylation level of the prognostic *TMEM18* that correlates with patients' survival status and increased risk scores.

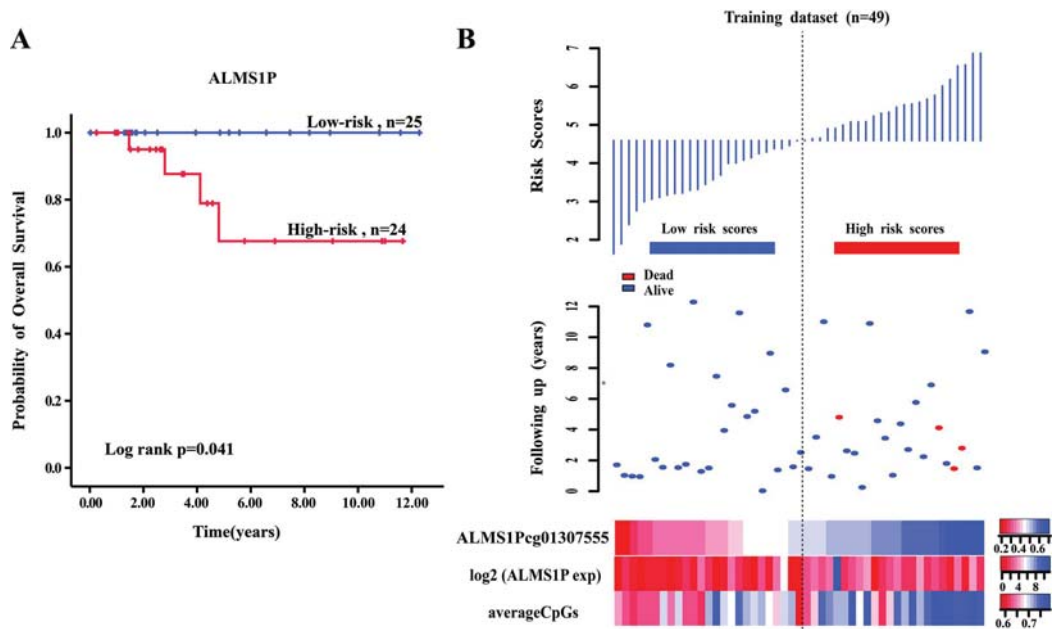

**Figure S4. The *ALMSIP* risk score model predicts overall survival of papillary thyroid carcinoma patients in the training dataset.** (A) Kaplan-Meier analysis for overall survival of patients with high-risk or low-risk scores. P value was calculated using the two-sided log-rank test. (B) DNA methylation pattern, expression level and average methylation level of the prognostic *ALMSIP* that correlates with patients' survival status and increased risk scores.

**Table S1. 1,239 genes were significantly related to chromosomal instability.**

| Gene Name |          |           |          |          |          |
|-----------|----------|-----------|----------|----------|----------|
| PARM1     | SLC7A10  | CTNNA2    | PDE4C    | GOLT1A   | KLHDC2   |
| CACNB3    | F10      | RNASE1    | GALR2    | FER1L6   | MKX      |
| KRTDAP    | SLC16A11 | RRP15     | NES      | SYDE2    | AGAP7    |
| CCDC48    | NRN1L    | ALG12     | PML      | SNRNP48  | CACNA1A  |
| PLOD2     | STRN3    | CLDN14    | PON3     | C9orf170 | CALM1    |
| IRF5      | PHF1     | ANKH      | ZNF138   | PGS1     | GLI3     |
| GGT6      | PPARD    | CMAH      | SNX11    | TPD52    | AIF1     |
| ZNF517    | PIK3R1   | KCNJ15    | FJX1     | GLCCI1   | PITPNA   |
| GJB3      | ZC3HAV1  | HEXIM2    | KCTD15   | CBX3     | SLC17A7  |
| HCRTR2    | MPL      | TGM2      | COL28A1  | MCM3     | SYT10    |
| CRBN      | SUSD2    | PLEKHG1   | TPSAB1   | TEX2     | ALPL     |
| KY        | PDIA6    | ZNF300    | CTF1     | ABCA1    | MGLL     |
| IGSF11    | MYLK4    | FAM109A   | DNAJC3   | TF       | SLC4A4   |
| SNX22     | DEPDC1B  | BMPR1A    | TBC1D22B | FFAR2    | EDARADD  |
| MAN2B1    | BSCL2    | C8orf31   | CISH     | DNAJC5B  | ENAH     |
| GLT25D2   | IRX1     | SPINK5    | SHROOM1  | OLR1     | SYNE2    |
| MRPL44    | DPF3     | HLA-DMB   | CLUAP1   | SMAD7    | CUL4A    |
| ALS2CL    | IL17RE   | AKR7L     | DARS     | HSPC157  | ATG9B    |
| PTGDS     | C21orf70 | LOC728613 | DGKB     | PEX19    | TMEM175  |
| PMM1      | ACPL2    | SPSB2     | ZBTB20   | FAM55D   | BEND7    |
| PTPRA     | SNX29    | TRPV2     | BEND4    | HCFC2    | SLC6A7   |
| UBE2Z     | ARHGAP10 | LAMA4     | GPR56    | FAM63A   | ADAMTSL3 |
| AIF1L     | SLC25A37 | LEPREL2   | LRRC16A  | TNS3     | MAP3K8   |
| MYLK2     | GPHN     | KLF5      | MMP9     | FAM47E   | MDGA2    |
| C20orf117 | ADD3     | SPIN3     | RHOBTB1  | CYR61    | NT5C2    |
| TMEM215   | NPHP1    | SATL1     | CHST11   | FSTL1    | C14orf4  |
| PVRL4     | ERN2     | ACIN1     | SLC26A11 | ANXA4    | VAR2     |
| UPK2      | PRKCD    | RASSF8    | TIGIT    | PSRC1    | FFAR1    |
| DNASE2    | GATA3    | LASS4     | SNTG2    | C13orf38 | VANGL2   |
| DGKI      | ASPRV1   | ITFG3     | SAFB     | MAFG     | IL12RB2  |
| MTMR11    | FERMT3   | C9orf163  | LINGO3   | SLC45A2  | TTC28    |
| PLB1      | MYB      | LFNG      | ELOVL5   | CLIC1    | C5orf20  |
| SERPINA1  | EP400    | ATP6V0A2  | HIPK2    | SPRED1   | STL      |
| C1orf70   | SEL1L3   | DDRKG1    | C1orf161 | GABRP    | LHFPL5   |
| PLXNA2    | SOX1     | TTC24     | CCDC105  | GPR31    | HSPA1A   |
| TMEM108   | OTUD7A   | TIFAB     | DCTD     | F11      | NAV3     |
| APEH      | MFNG     | NAALADL2  | HLA-E    | ANXA11   | PROCR    |
| PTPN22    | VAC14    | CMTM4     | TBX1     | SGK269   | PTK2B    |
| ZNF204P   | HGFAC    | MORN4     | SEMA3B   | FLII     | MAPRE3   |
| DIAPH1    | TMC8     | VDR       | FGF1     | IFT172   | GNLY     |
| HHIPL1    | SDHA     | C6orf155  | HOXA2    | RNH1     | CCR9     |
| ADORA1    | ZFYVE21  | SPINT2    | ACCN1    | KIAA1644 | PTBP1    |

|          |           |          |          |                |                |
|----------|-----------|----------|----------|----------------|----------------|
| PRRT3    | C5orf32   | ARF6     | FZR1     | CFH            | MAP7D1         |
| TRPC4AP  | DISP2     | ACCN3    | NSUN7    | SHC4           | SLC16A4        |
| P4HA2    | FAM13AOS  | LY9      | C2orf54  | TMEM179        | SNX10          |
| SEC14L4  | TRAF2     | SERPINA3 | CDC42BPB | WWP1           | ZSWIM4         |
| PDK4     | DQX1      | C17orf58 | NSMCE1   | ARIH2          | SPARC          |
| ALMS1P   | WBSCR16   | SGCB     | CCDC42   | MACROD2        | RIN3           |
| IKZF2    | PTCRA     | RASSF6   | SLC22A17 | DISP1          | THBS4          |
| SHD      | FAM184B   | ENTPD7   | KCTD1    | PCYT1A         | TAP1           |
| MLLT4    | AEBP1     | NET1     | SATB1    | IL4            | ST6GALNA<br>C3 |
| NPEPL1   | ASCL3     | CXorf56  | THAP4    | HGSNAT         | TARS           |
| CAND2    | RNF222    | WDR19    | HS3ST4   | GPR120         | KRT4           |
| MLPH     | C16orf52  | POU6F2   | RAVER2   | IMPACT         | TMEM121        |
| CHI3L2   | EPHA7     | KIRREL3  | PUM1     | STK33          | FCER1G         |
| SLC24A4  | TMEM156   | TBC1D9   | MYOF     | CSGALNAC<br>T2 | ASB18          |
| OR6F1    | PDE6B     | GMPR     | BAI3     | CTTN           | FIBP           |
| UTRN     | GKN2      | DCP2     | ADRA2A   | POLR3K         | RBMS2          |
| RAG1AP1  | EGFR      | SLC4A2   | BAK1     | NTSR1          | SPINT1         |
| NFATC4   | LOC400657 | PROKR2   | C10orf11 | POLA2          | IQCJ           |
| WISP2    | PKNOX2    | ACSM5    | C2orf55  | CLN8           | OPN3           |
| ADRM1    | FGF23     | STK17A   | SMYD2    | KRTCAP3        | AKR1B1         |
| MEGF9    | PEBP4     | ROPN1L   | KIAA0495 | ANKS1B         | CNNM1          |
| CTNNA1   | TRMT1     | FCRL5    | LMOD2    | TREML2         | IL10RB         |
| ABTB2    | NODAL     | C22orf43 | SPTBN4   | VAV3           | FAM46B         |
| TMEM233  | IL21R     | EXT2     | TRAK1    | JAK1           | LOC285033      |
| ESYT3    | MICALL1   | MATR3    | TBR1     | ZC3H6          | TUFT1          |
| UACA     | TMEM18    | APLP2    | DYNC1I2  | GDF6           | SNX33          |
| DNAJC6   | OSR1      | XPR1     | FRAS1    | EPHA10         | PPP3CC         |
| ERC1     | PTPRCAP   | COBL     | CLDN11   | TNFAIP3        | PTGIR          |
| PI4KB    | LAG3      | THRA     | CHL1     | RCN1           | CYP27C1        |
| C6orf168 | INPP5F    | CEACAM1  | AHR      | C6orf174       | IMMP2L         |
| C1orf111 | EIF4G1    | ALDH4A1  | NEDD4L   | NPBWR2         | ACLY           |
| TRAP1    | RAB5C     | BRE      | DPYD     | BTN3A3         | ALOX12         |
| CST6     | SMTN      | RNF212   | JRK      | CCM2           | MGC29506       |
| AP3S2    | RGL3      | TMIGD2   | VPS13D   | EPHA8          | ZAK            |
| MGEA5    | ZBTB24    | C17orf82 | ADCY6    | LOC285954      | FOSL2          |
| CARD9    | CPAMD8    | ZNF217   | TBC1D22A | ABI2           | C1orf173       |
| LOX      | E2F6      | YWHAB    | PSMB8    | TOR1AIP1       | ARHGAP23       |
| KLRAQ1   | TMEM132E  | ZNF704   | MBOAT1   | SLC39A4        | DHRS11         |
| NRIP1    | TCFL5     | DAGLA    | GZF1     | GNA14          | KCTD3          |
| FAM92B   | C1orf230  | TAS2R16  | MMP14    | MTUS1          | GFI1           |
| PTGER1   | PPAPDC1A  | NCOA4    | DEDD2    | IL15           | ASCL4          |
| ZNF133   | LOC283050 | C7orf4   | CYTH1    | CYTH4          | RFC1           |

|          |         |          |          |          |           |
|----------|---------|----------|----------|----------|-----------|
| NECAB2   | GNB1    | GPR83    | C11orf75 | ST6GAL2  | SMAD3     |
| PHACTR2  | BTN1A1  | ZNF606   | ESPNP    | USP10    | ATP6V1H   |
| MN1      | BCAM    | ZNF259   | SHMT2    | TESC     | KCNH4     |
| TCF23    | NDST1   | C1orf187 | ZFP37    | EOMES    | UBE2QL1   |
| NKX2-8   | PDGFD   | SLC6A12  | TJP3     | PRSS42   | INHBB     |
| KIAA1191 | MICB    | SPAG17   | RAD9A    | ASB9     | CDRT4     |
| UNC5CL   | IL16    | RPP14    | KLHDC7A  | GRM2     | NIPA1     |
| NHSL1    | FNDC3B  | TMEM87A  | ZNF544   | ACY1     | C6orf186  |
| GATSL3   | NECAB1  | ZNF876P  | RABGAP1  | SLC6A3   | PDE4DIP   |
| CREB3L1  | ABCC1   | EBAG9    | DBC1     | SGSM1    | ZFP64     |
| ABCB9    | B3GALT4 | KLF6     | ZWINT    | CLIP4    | EN2       |
| MPHOSPH6 | SGMS1   | PTPLA    | GMIP     | HCG9     | GBX2      |
| RUFY3    | KCNN4   | IGF1     | G0S2     | RAPGEF3  | XPNPEP2   |
| KCNA6    | DENND1C | LGALS12  | NAT8B    | SLC5A9   | RFX4      |
| AXL      | NR1H3   | SFTA3    | EPHB1    | MFSD6    | DDX47     |
| TRIM54   | SLFN12L | FBXO32   | ABHD15   | NUAK2    | ATP8B4    |
| MED29    | PHACTR1 | RAB17    | TINAGL1  | HMG20B   | NKD2      |
| FBXL18   | PDCD1   | CD80     | FZD8     | MTF1     | COMMD3    |
| ADAM15   | TMC3    | RAB31    | ZNF774   | RAPGEF1  | SPATA7    |
| TXNDC11  | FLG2    | SYNJ2    | ATP6V1B2 | WRNIP1   | BAIAP2L1  |
| NTHL1    | STEAP3  | GNAT1    | SETD3    | SHB      | CTNNBIP1  |
| SUSD1    | RIBC2   | RHOBTB2  | C2orf3   | ARHGEF4  | EGFLAM    |
| CAPN5    | PGCP    | LDB2     | ZNF502   | FZD5     | SETMAR    |
| ADCY7    | SOAT2   | PRPF4B   | FAT3     | SGEF     | MASP1     |
| NXF3     | TAF4    | SAMD11   | LRRC1    | WDR66    | RAN       |
| CDK6     | VSNL1   | FAM129B  | C12orf56 | WNK2     | PTPN7     |
| TLR2     | RORA    | MAPKAP1  | POU2F2   | TNC      | C20orf108 |
| SLC12A6  | TEDDM1  | CDH2     | LPAR4    | NFIL3    | TMEM140   |
| TP53I3   | RAD51L1 | MFAP3L   | APBA2    | TMEM72   | ELOVL2    |
| FAM101A  | CTBP1   | FAM54B   | TMEM30B  | SCTR     | TRHR      |
| ZFAT     | CTHRC1  | HOMER2   | CYP2W1   | RFC2     | KCTD10    |
| NDUFA10  | TSPAN9  | SORT1    | B4GALNT4 | KIAA1045 | PVT1      |
| CPO      | RCS1    | AK3      | MARCH10  | C10orf26 | CRTAM     |
| GTSF1    | XYLT1   | HOXA10   | NDUFA11  | SLC38A3  | PRMT2     |
| SPIB     | CRTAP   | HCN4     | MXRA5    | EXT1     | DPP9      |
| FMOD     | KRBA1   | CCND1    | DEPDC5   | SERPINC1 | C10orf58  |
| PGAP3    | NUPR1   | EDIL3    | DCAKD    | TMEM149  | ADARB1    |
| MXD4     | SLC16A5 | MCTS1    | GNAI1    | GTPBP8   | FAM13C    |
| UBE2C    | ITGA4   | PYCARD   | PDPN     | ZNF594   | CRELD2    |
| PYROXD2  | CCDC81  | ZNF560   | SIGLEC6  | ABCA2    | NT5C3     |
| RSPH4A   | IRF8    | INADL    | B4GALT6  | SHC3     | RAB11FIP1 |
| ETS1     | GDF11   | YAP1     | ESRP1    | CPT1C    | AKAP12    |
| ABCA3    | MFGE8   | TRIM10   | PROX1    | SLC20A2  | POU2F1    |
| RGS9BP   | ZFPM2   | UBAC2    | IL24     | DOK2     | ORC4L     |

|           |               |          |           |           |           |
|-----------|---------------|----------|-----------|-----------|-----------|
| CDK5R1    | BAIAP3        | TM9SF1   | ASIP      | MPDZ      | MKRN3     |
| RNF135    | C15orf23      | CCDC85C  | ZNF322A   | DCAF12    | EGR3      |
| KIAA1274  | ZNF839        | JARID2   | ITGAL     | GUCY2D    | ZNF793    |
| C10orf82  | RCOR1         | TMEM110  | SLC38A5   | SSH2      | PPP1R14C  |
| MED16     | LOC153328     | GDI2     | MGST3     | KIAA0020  | THSD1     |
| ZSWIM5    | RAP2B         | C1R      | LOC285692 | FOXB2     | SCML4     |
| LRP12     | TRAF3         | EDNRA    | SDSL      | ZNF703    | FBXL21    |
| SDCBP2    | ALX4          | GLB1L3   | FLT3      | KEL       | SLC25A29  |
| SUV420H1  | PABPC4        | FBXO21   | ZNF397OS  | HUNK      | COL1A1    |
| LOC148696 | UBE2I         | DGKD     | CASP4     | TPRKB     | EPHA5     |
| GPATCH1   | KRT6A         | WNT5A    | NFKBIL2   | PADI4     | TMEM150C  |
| CRYBB1    | BMP5          | EFNA3    | NOV       | KRT7      | HOXA1     |
| ULK2      | HDLBP         | ELOVL4   | SIAH2     | GRIN3A    | NRBP2     |
| SLC38A8   | ASPH          | PSORS1C1 | TUB       | PKLR      | SLC25A42  |
| PNPLA7    | EPB49         | CD79A    | MLF1      | FAM105B   | CPSF4     |
| WDFY4     | C1orf113      | STK39    | SMAD6     | C2orf73   | TTC7A     |
| RSPO1     | ASCL2         | CORO1A   | GCOM1     | C6orf132  | TCOF1     |
| CAPG      | LAMA5         | PSMB9    | SNX4      | CDH22     | UBTF      |
| CYP27B1   | PLEKHA1       | C11orf24 | SOX6      | TNFRSF13C | SPEN      |
| WNT7A     | THEM4         | CCDC12   | EPOR      | WNK4      | DNAL4     |
| LOC399959 | SPRY4         | GOLGA3   | PIP4K2B   | RASGEF1A  | ZNF814    |
| SLC38A7   | APPL1         | SLC13A3  | HAVCR2    | LOC339674 | C2orf85   |
| FHL3      | SLC5A11       | CNRIP1   | MTHFR     | GLUL      | RNF185    |
| FAM84B    | PPP1R1B       | ZNF438   | ABHD6     | UBR4      | TPCN1     |
| RDH13     | PABPN1L       | GATA4    | FARS2     | RBP7      | PLAC2     |
| C6orf142  | PUSL1         | SPATA2L  | L3MBTL4   | HPN       | C21orf88  |
| PPFIBP2   | CABLES1       | TPM4     | BMP2      | RAB19     | KRT12     |
| CHAC1     | SPATS2L       | FLJ42709 | NUDT16    | ROBO1     | GPR124    |
| ZNF311    | SNTG1         | CYB5R4   | CHRM3     | ICOS      | SPATC1    |
| PDE4A     | KIFC3         | GNAQ     | CEACAM3   | LAPTM5    | C1orf168  |
| IL6       | MAP1LC3B<br>2 | ABCB6    | SHISA2    | CASC3     | RHOG      |
| TMPRSS13  | LMNB1         | AQP2     | TPBG      | CRHR2     | BCL2L15   |
| VPS37B    | MAPKAPK2      | BCAR1    | KIAA0040  | BTN2A3    | RASGRF1   |
| SIAH1     | EVC2          | C1orf93  | TMEM63A   | BAI2      | PARP1     |
| MRGPRE    | PLCG1         | C14orf23 | GPR158    | TBC1D10C  | GOLIM4    |
| FAM163A   | KHDC1L        | RNF126P1 | LATS2     | APOA4     | PCCA      |
| RNF186    | ELMO3         | KRT78    | C1orf103  | PPP1R1C   | VEGFA     |
| N4BP2L2   | ZDHHC23       | HSD11B1  | CRYBG3    | RDX       | GPR20     |
| ICK       | VWA3B         | TMC6     | ZSCAN22   | SLC40A1   | UCP2      |
| ZDHHC1    | FAM3D         | GPR61    | C6orf176  | ENTPD4    | CPA5      |
| GRINA     | HOXB9         | ENPP7    | AP1M2     | PPP2R5C   | C10orf110 |
| ZFP1      | RUNX1         | CYB561   | LOC284009 | TPCN2     | CCDC116   |
| DNAH6     | MIPOL1        | PAX2     | CCRL2     | RNPEP     | SMYD5     |



|                  |           |           |               |               |                  |
|------------------|-----------|-----------|---------------|---------------|------------------|
| ABCC3            | C6orf118  | LAX1      | NAA25         | NRM           | TGFA             |
| CDH7             | TRPM5     | ANKK1     | NFKBIE        | C6orf25       | NRP1             |
| SLC30A2          | NRD1      | IMPDH1    | ST8SIA1       | ONECUT1       | CELSR2           |
| HES5             | BCL10     | LAT       | SERPINI2      | C2orf29       | IFI30            |
| SEC11A           | ARL9      | GRB2      | GAL3ST3       | SPATA20       | CX3CR1           |
| FREM2            | SLC22A5   | C1orf86   | SORCS1        | KIAA0415      | COL17A1          |
| LRFN1            | IL6R      | C22orf15  | SHMT1         | LIPC          | NID2             |
| LOC100132<br>354 | KALRN     | FCGRT     | NMI           | C10orf81      | APOD             |
| FASLG            | DYNLL2    | ARPC1B    | MYO16         | ZNF528        | CDH1             |
| BTBD19           | SACS      | PRDX1     | FBXL2         | KIAA0427      | SYT2             |
| MBNL1            | CCDC68    | KCNJ1     | RPS6KA1       | ADCYAP1R<br>1 | SNCA             |
| MORN1            | PDCD1LG2  | PHLPP1    | IL5RA         | MARCH4        | KISS1            |
| CRLF3            | KRT8      | RFWD2     | FAAH          | FAM20C        | RNF40            |
| PSMA8            | MC1R      | TNFAIP8L3 | MAP7          | ZNF529        | CENPN            |
| SGIP1            | IFIT3     | TMEM132A  | METRNL        | EML1          | FLJ33360         |
| REG4             | IFIH1     | ZKSCAN2   | EFNA1         | MAPK10        | RGL1             |
| ABCB10           | TTPA      | GLDN      | SETD6         | RBM45         | CMPK1            |
| HMGCS1           | IL31RA    | TBC1D12   | ITPK1         | FBXO6         | NINJ1            |
| LOXL1            | SLC25A38  | CCR7      | CDKL1         | TRUB1         | PLCG2            |
| DECR2            | IGF2BP2   | SH3BP1    | MET           | HLA-DPB1      | TACC2            |
| TRAF3IP2         | PARD3     | FAM172A   | GRIN2C        | SDCBP         | NAA40            |
| RAC1             | CASP7     | SLC4A9    | GABARAPL<br>1 | ASB16         | SLC39A11         |
| GRAP2            | CNTN6     | CLPTM1L   | ANKFN1        | DDR2          | LOC1001909<br>39 |
| ICAM4            | STRADA    | FAM115C   | SLC9A2        | EEPD1         | TFPI             |
| TAF12            | SLCO2A1   | SIL1      | CYB5R1        | FAM57A        | GTF3C1           |
| CXCL1            | ZNF853    | ORAOV1    | SLC41A3       | NR2E1         | RFX1             |
| CHN2             | MED12L    | RAP1A     | MLN           | NSD1          | MTIF2            |
| VAMP1            | LOC146880 | RNF166    | SLC6A1        | FOXG1         | RARRES2          |
| TGFB1I1          | FOXL1     | GEMIN8    | DIRC2         | FAM181B       | MOXD1            |
| UTF1             | WRB       | SOCS2     | MRAS          | CIB4          | SIDT1            |
| NCK2             | CBLB      | CD3D      | IGFBP5        | FAM171A2      | CLEC18B          |
| TAP2             | ARHGAP6   | DDX51     | CX3CL1        | PRDM10        | UNKL             |
| ST3GAL1          | ADK       | CAMK2D    | LRRC42        | PLXNA4        | C12orf42         |
| MOBK1B           | ACVR1C    | CDH16     | DNAH14        | LCP1          | CAMTA2           |
| PHF21B           | E4F1      | TLE2      | C17orf97      | MAPKBP1       | TRIM58           |
| PAX9             | KIAA1199  | SLC2A9    |               |               |                  |

**Table S2. 572 of 1,239 genes were hypermethylation phenotypes.**

| Gene Name |           |           |          |           |          |
|-----------|-----------|-----------|----------|-----------|----------|
| PARM1     | RUFY3     | PLCG1     | CXorf56  | NDUFA11   | TPD52    |
| CACNB3    | KCNA6     | KHDC1L    | WDR19    | MXRA5     | GLCCI1   |
| KRTDAP    | AXL       | ELMO3     | POU6F2   | DEPDC5    | CBX3     |
| CCDC48    | TRIM54    | ZDHHC23   | KIRREL3  | DCAKD     | MCM3     |
| PLOD2     | MED29     | VWA3B     | TBC1D9   | GNAI1     | TEX2     |
| IRF5      | FBXL18    | FAM3D     | GMPR     | PDPN      | ABCA1    |
| GGT6      | ADAM15    | HOXB9     | DCP2     | SIGLEC6   | TF       |
| ZNF517    | TXNDC11   | RUNX1     | SLC4A2   | B4GALT6   | FFAR2    |
| GJB3      | NTHL1     | MIPOL1    | PROKR2   | ESRP1     | DNAJC5B  |
| HCRTR2    | SUSD1     | C6orf118  | ACSM5    | PROX1     | OLR1     |
| CRBN      | CAPN5     | TRPM5     | STK17A   | IL24      | SMAD7    |
| KY        | ADCY7     | NRD1      | ROPN1L   | ASIP      | PEX19    |
| IGSF11    | NXF3      | BCL10     | FCRL5    | ZNF322A   | FAM55D   |
| SNX22     | CDK6      | ARL9      | C22orf43 | ITGAL     | HCFC2    |
| MAN2B1    | TLR2      | SLC22A5   | EXT2     | SLC38A5   | FAM63A   |
| GLT25D2   | SLC12A6   | IL6R      | MATR3    | MGST3     | TNS3     |
| MRPL44    | TP53I3    | KALRN     | APLP2    | LOC285692 | FAM47E   |
| ALS2CL    | FAM101A   | DYNLL2    | XPR1     | SDSL      | CYR61    |
| PTGDS     | ZFAT      | SACS      | COBL     | FLT3      | FSTL1    |
| PMM1      | NDUFA10   | CCDC68    | THRA     | ZNF397OS  | ANXA4    |
| PTPRA     | CPO       | PDCD1LG2  | CEACAM1  | CASP4     | PSRC1    |
| UBE2Z     | GTSF1     | KRT8      | ALDH4A1  | NFKBIL2   | C13orf38 |
| AIF1L     | SPIB      | MC1R      | BRE      | NOV       | MAFG     |
| MYLK2     | FMOD      | IFIT3     | RNF212   | SIAH2     | SLC45A2  |
| C20orf117 | PGAP3     | IFIH1     | TMIGD2   | TUB       | CLIC1    |
| TMEM215   | MXD4      | TTPA      | C17orf82 | MLF1      | SPRED1   |
| PVRL4     | UBE2C     | IL31RA    | ZNF217   | SMAD6     | GABRP    |
| UPK2      | PYROXD2   | SLC25A38  | YWHAB    | GCOM1     | GPR31    |
| DNASE2    | RSPH4A    | IGF2BP2   | ZNF704   | SNX4      | F11      |
| DGKI      | ETS1      | PARD3     | DAGLA    | SOX6      | ANXA11   |
| MTMR11    | ABCA3     | CASP7     | TAS2R16  | EPOR      | SGK269   |
| PLB1      | RGS9BP    | CNTN6     | NCOA4    | PIP4K2B   | FLII     |
| SERPINA1  | CDK5R1    | STRADA    | C7orf4   | HAVCR2    | IFT172   |
| C1orf70   | RNF135    | SLCO2A1   | GPR83    | MTHFR     | RNH1     |
| PLXNA2    | KIAA1274  | ZNF853    | ZNF606   | ABHD6     | KIAA1644 |
| TMEM108   | C10orf82  | MED12L    | ZNF259   | FARS2     | CFH      |
| APEH      | MED16     | LOC146880 | C1orf187 | L3MBTL4   | SHC4     |
| PTPN22    | ZSWIM5    | FOXL1     | SLC6A12  | BMP2      | TMEM179  |
| ZNF204P   | LRP12     | WRB       | SPAG17   | NUDT16    | WWP1     |
| DIAPH1    | SDCBP2    | CBLB      | RPP14    | CHRM3     | ARIH2    |
| HHIPL1    | SUV420H1  | ARHGAP6   | TMEM87A  | CEACAM3   | MACROD2  |
| ADORA1    | LOC148696 | ADK       | ZNF876P  | SHISA2    | DISP1    |

|          |           |           |          |               |                |
|----------|-----------|-----------|----------|---------------|----------------|
| PRRT3    | GPATCH1   | ACVRI1C   | EBAG9    | TPBG          | PCYT1A         |
| TRPC4AP  | CRYBB1    | E4F1      | KLF6     | KIAA0040      | IL4            |
| P4HA2    | ULK2      | KIAA1199  | PTPLA    | TMEM63A       | HGSNAT         |
| SEC14L4  | SLC38A8   | CTNNA2    | IGF1     | GPR158        | GPR120         |
| PDK4     | PNPLA7    | RNASE1    | LGALS12  | LATS2         | IMPACT         |
| ALMS1P   | WDFY4     | RRP15     | SFTA3    | C1orf103      | STK33          |
| IKZF2    | RSPO1     | ALG12     | FBXO32   | CRYBG3        | CSGALNAC<br>T2 |
| SHD      | CAPG      | CLDN14    | RAB17    | ZSCAN22       | CTTN           |
| MLLT4    | CYP27B1   | ANKH      | CD80     | C6orf176      | FFAR1          |
| NPEPL1   | WNT7A     | CMAH      | RAB31    | AP1M2         | VANGL2         |
| CAND2    | LOC399959 | KCNJ15    | SYNJ2    | LOC284009     | IL12RB2        |
| MLPH     | SLC38A7   | HEXIM2    | GNAT1    | CCRL2         | TTC28          |
| CHI3L2   | FHL3      | TGM2      | RHOBTB2  | NAA25         | C5orf20        |
| SLC24A4  | FAM84B    | PLEKHG1   | LDB2     | NFKBIE        | STL            |
| OR6F1    | RDH13     | ZNF300    | PRPF4B   | ST8SIA1       | LHFPL5         |
| UTRN     | C6orf142  | FAM109A   | SAMD11   | SERPINI2      | HSPA1A         |
| RAG1AP1  | PPFIBP2   | BMPR1A    | FAM129B  | GAL3ST3       | NAV3           |
| NFATC4   | CHAC1     | C8orf31   | MAPKAP1  | SORCS1        | PROCR          |
| WISP2    | ZNF311    | SPINK5    | CDH2     | SHMT1         | PTK2B          |
| ADRM1    | PDE4A     | HLA-DMB   | MFAP3L   | NMI           | MAPRE3         |
| MEGF9    | IL6       | AKR7L     | FAM54B   | MYO16         | GNLY           |
| CTNNA1   | TMPRSS13  | LOC728613 | HOMER2   | FBXL2         | CCR9           |
| ABTB2    | VPS37B    | SPSB2     | SORT1    | RPS6KA1       | PTBP1          |
| TMEM233  | SIAH1     | TRPV2     | AK3      | IL5RA         | MAP7D1         |
| ESYT3    | MRGPRE    | LAMA4     | ZFP37    | FAAH          | SLC16A4        |
| UACA     | FAM163A   | LEPREL2   | TJP3     | MAP7          | SNX10          |
| DNAJC6   | RNF186    | KLF5      | RAD9A    | METRNL        | ZSWIM4         |
| ERC1     | N4BP2L2   | SPIN3     | KLHDC7A  | EFNA1         | SPARC          |
| PI4KB    | ICK       | SATL1     | ZNF544   | SETD6         | RIN3           |
| C6orf168 | ZDHHC1    | ACIN1     | RABGAP1  | ITPK1         | THBS4          |
| C1orf111 | GRINA     | RASSF8    | DBC1     | CDKL1         | TAP1           |
| TRAP1    | ZFP1      | LASS4     | ZWINT    | MET           | ST6GALNA<br>C3 |
| CST6     | DNAH6     | ITFG3     | GMIP     | GRIN2C        | TARS           |
| AP3S2    | ABCC3     | C9orf163  | G0S2     | GABARAPL<br>1 | KRT4           |
| MGEA5    | CDH7      | LFNG      | NAT8B    | ANKFN1        | TMEM121        |
| CARD9    | SLC30A2   | ATP6V0A2  | EPHB1    | SLC9A2        | FCER1G         |
| LOX      | HES5      | DDRKG1    | ABHD15   | CYB5R1        | ASB18          |
| KLRAQ1   | SEC11A    | TTC24     | TINAGL1  | SLC41A3       | FIBP           |
| NRIP1    | FREM2     | TIFAB     | FZD8     | MLN           | RBMS2          |
| FAM92B   | THEM4     | NAALADL2  | ZNF774   | SLC6A1        | SPINT1         |
| PTGER1   | SPRY4     | CMTM4     | ATP6V1B2 | DIRC2         | IQCJ           |

|          |               |          |          |          |           |
|----------|---------------|----------|----------|----------|-----------|
| ZNF133   | APPL1         | MORN4    | SETD3    | MRAS     | OPN3      |
| NECAB2   | SLC5A11       | VDR      | C2orf3   | IGFBP5   | AKR1B1    |
| PHACTR2  | PPP1R1B       | C6orf155 | ZNF502   | CX3CL1   | CNNM1     |
| MN1      | PABPN1L       | SPINT2   | FAT3     | LRRC42   | IL10RB    |
| TCF23    | PUSL1         | ARF6     | LRRC1    | DNAH14   | FAM46B    |
| NKX2-8   | CABLES1       | ACCN3    | C12orf56 | C17orf97 | LOC285033 |
| KIAA1191 | SPATS2L       | LY9      | POU2F2   | TRIM58   | TUFT1     |
| UNC5CL   | SNTG1         | SERPINA3 | LPAR4    | GOLT1A   | SNX33     |
| NHSL1    | KIFC3         | C17orf58 | APBA2    | FER1L6   | HSPC157   |
| GATSL3   | MAP1LC3B<br>2 | SGCB     | TMEM30B  | SYDE2    | PGS1      |
| CREB3L1  | LMNB1         | RASSF6   | CYP2W1   | SNRNP48  | MARCH10   |
| ABCB9    | MAPKAPK2      | ENTPD7   | B4GALNT4 | C9orf170 | NET1      |
| MPHOSPH6 | EVC2          |          |          |          |           |

**Table S3. 667 of 1,239 genes were hypomethylation phenotypes.**

| Gene Name        |           |           |          |           |           |
|------------------|-----------|-----------|----------|-----------|-----------|
| LRFN1            | PPAPDC1A  | RNF126P1  | FRAS1    | LOC339674 | GBX2      |
| LOC100132<br>354 | LOC283050 | KRT78     | CLDN11   | GLUL      | XPNPEP2   |
| FASLG            | GNB1      | HSD11B1   | CHL1     | UBR4      | RFX4      |
| BTBD19           | BTN1A1    | TMC6      | AHR      | RBP7      | DDX47     |
| MBNL1            | BCAM      | GPR61     | NEDD4L   | HPN       | ATP8B4    |
| MORN1            | NDST1     | ENPP7     | DPYD     | RAB19     | NKD2      |
| CRLF3            | PDGFD     | CYB561    | JRK      | ROBO1     | COMMD3    |
| PSMA8            | MICB      | PAX2      | VPS13D   | ICOS      | SPATA7    |
| SGIP1            | IL16      | LAX1      | ADCY6    | LAPTM5    | BAIAP2L1  |
| REG4             | FNDC3B    | ANKK1     | TBC1D22A | CASC3     | CTNNBIP1  |
| ABCB10           | NECAB1    | IMPDH1    | PSMB8    | CRHR2     | EGFLAM    |
| HMGCS1           | ABCC1     | LAT       | MBOAT1   | BTN2A3    | SETMAR    |
| LOXL1            | B3GALT4   | GRB2      | GZF1     | BAI2      | MASP1     |
| DECR2            | SGMS1     | C1orf86   | MMP14    | TBC1D10C  | RAN       |
| TRAF3IP2         | KCNN4     | C22orf15  | DEDD2    | APOA4     | PTPN7     |
| RAC1             | DENND1C   | FCGRT     | CYTH1    | PPP1R1C   | C20orf108 |
| GRAP2            | NR1H3     | ARPC1B    | C11orf75 | RDX       | TMEM140   |
| ICAM4            | SLFN12L   | PRDX1     | ESPNP    | SLC40A1   | TRHR      |
| TAF12            | PHACTR1   | KCNJ1     | SHMT2    | ENTPD4    | KCTD10    |
| CXCL1            | PDCD1     | PHLPP1    | POLR3K   | PPP2R5C   | PVT1      |
| CHN2             | TMC3      | RFWD2     | NTSR1    | TPCN2     | CRTAM     |
| VAMP1            | FLG2      | TNFAIP8L3 | POLA2    | RNPEP     | PRMT2     |

|          |           |          |           |               |           |
|----------|-----------|----------|-----------|---------------|-----------|
| TGFB111  | STEAP3    | TMEM132A | CLN8      | NRM           | DPP9      |
| UTF1     | RIBC2     | ZKSCAN2  | KRTCAP3   | C6orf25       | C10orf58  |
| NCK2     | PGCP      | GLDN     | ANKS1B    | ONECUT1       | ADARB1    |
| TAP2     | SOAT2     | TBC1D12  | TREML2    | C2orf29       | FAM13C    |
| ST3GAL1  | TAF4      | CCR7     | VAV3      | SPATA20       | CRELD2    |
| MOBK1B   | VSNL1     | SH3BP1   | JAK1      | KIAA0415      | NT5C3     |
| PHF21B   | RORA      | FAM172A  | ZC3H6     | LIPC          | RAB11FIP1 |
| PAX9     | TEDDM1    | SLC4A9   | GDF6      | C10orf81      | AKAP12    |
| SLC7A10  | RAD51L1   | CLPTM1L  | EPHA10    | ZNF528        | POU2F1    |
| F10      | CTBP1     | FAM115C  | TNFAIP3   | KIAA0427      | ORC4L     |
| SLC16A11 | CTHRC1    | SIL1     | RCN1      | ADCYAP1R<br>1 | MKRN3     |
| NRN1L    | TSPAN9    | ORAOV1   | C6orf174  | FAM20C        | EGR3      |
| STRN3    | RCS1      | RAP1A    | NPBWR2    | ZNF529        | ZNF793    |
| PHF1     | XYLT1     | RNF166   | BTN3A3    | EML1          | PPP1R14C  |
| PPARD    | CRTAP     | GEMIN8   | CCM2      | MAPK10        | THSD1     |
| PIK3R1   | KRBA1     | SOCS2    | EPHA8     | RBM45         | SCML4     |
| ZC3HAV1  | NUPR1     | CD3D     | LOC285954 | FBXO6         | FBXL21    |
| MPL      | SLC16A5   | DDX51    | ABI2      | TRUB1         | SLC25A29  |
| SUSD2    | ITGA4     | CAMK2D   | TOR1AIP1  | HLA-DPB1      | COL1A1    |
| PDIA6    | CCDC81    | CDH16    | SLC39A4   | SDCBP         | EPHA5     |
| MYLK4    | IRF8      | TLE2     | GNA14     | ASB16         | TMEM150C  |
| DEPDC1B  | GDF11     | SLC2A9   | MTUS1     | DDR2          | HOXA1     |
| BSCL2    | MFGE8     | PDE4C    | IL15      | EEPD1         | NRBP2     |
| IRX1     | ZFPM2     | GALR2    | CYTH4     | FAM57A        | SLC25A42  |
| DPF3     | BAIAP3    | NES      | ST6GAL2   | NR2E1         | CPSF4     |
| IL17RE   | C15orf23  | PML      | USP10     | NSD1          | TTC7A     |
| C21orf70 | ZNF839    | PON3     | EOMES     | FOXG1         | TCOF1     |
| ACPL2    | RCOR1     | ZNF138   | PRSS42    | FAM181B       | UBTF      |
| SNX29    | LOC153328 | SNX11    | ASB9      | CIB4          | SPEN      |
| ARHGAP10 | RAP2B     | FJX1     | GRM2      | FAM171A2      | DNAL4     |
| SLC25A37 | TRAF3     | KCTD15   | ACY1      | PRDM10        | ZNF814    |
| GPHN     | ALX4      | COL28A1  | SLC6A3    | PLXNA4        | C2orf85   |
| ADD3     | PABPC4    | TPSAB1   | SGSM1     | LCP1          | RNF185    |
| NPHP1    | UBE2I     | CTF1     | CLIP4     | MAPKBP1       | TPCN1     |
| ERN2     | KRT6A     | DNAJC3   | HCG9      | CAMTA2        | PLAC2     |
| PRKCD    | BMP5      | TBC1D22B | RAPGEF3   | KLHDC2        | C21orf88  |
| GATA3    | HDLBP     | CISH     | SLC5A9    | MKX           | KRT12     |
| ASPRV1   | ASPH      | SHROOM1  | MFSD6     | AGAP7         | GPR124    |
| FERMT3   | EPB49     | CLUAP1   | NUAK2     | CACNA1A       | SPATC1    |
| MYB      | C1orf113  | DARS     | HMG20B    | CALM1         | C1orf168  |
| EP400    | ASCL2     | DGKB     | MTF1      | GLI3          | RHOG      |
| SEL1L3   | LAMA5     | ZBTB20   | RAPGEF1   | AIF1          | BCL2L15   |
| SOX1     | PLEKHA1   | GPR56    | WRNIP1    | PITPNA        | RASGRF1   |

|           |          |          |          |          |            |
|-----------|----------|----------|----------|----------|------------|
| OTUD7A    | HOXA10   | LRRC16A  | SHB      | SLC17A7  | PARP1      |
| MFNG      | HCN4     | MMP9     | ARHGEF4  | SYT10    | GOLIM4     |
| VAC14     | CCND1    | RHOBTB1  | FZD5     | ALPL     | PCCA       |
| HGFAC     | EDIL3    | CHST11   | SGEF     | MGLL     | VEGFA      |
| TMC8      | MCTS1    | SLC26A11 | WDR66    | SLC4A4   | GPR20      |
| SDHA      | PYCARD   | TIGIT    | WNK2     | EDARADD  | UCP2       |
| ZFYVE21   | ZNF560   | SNTG2    | TNC      | ENAH     | CPA5       |
| C5orf32   | INADL    | SAFB     | NFIL3    | SYNE2    | C10orf110  |
| DISP2     | YAP1     | LINGO3   | TMEM72   | CUL4A    | CCDC116    |
| FAM13AOS  | TRIM10   | ELOVL5   | SCTR     | ATG9B    | SMYD5      |
| TRAF2     | UBAC2    | HIPK2    | RFC2     | TMEM175  | TGFA       |
| DQX1      | TM9SF1   | C1orf161 | KIAA1045 | BEND7    | NRP1       |
| WBSCR16   | CCDC85C  | CCDC105  | C10orf26 | SLC6A7   | CELSR2     |
| PTCRA     | JARID2   | DCTD     | SLC38A3  | ADAMTSL3 | IFI30      |
| FAM184B   | TMEM110  | HLA-E    | EXT1     | MAP3K8   | CX3CR1     |
| AEBP1     | GDI2     | TBX1     | SERPINC1 | MDGA2    | COL17A1    |
| ASCL3     | C1R      | SEMA3B   | TMEM149  | NT5C2    | NID2       |
| RNF222    | EDNRA    | FGF1     | GTPBP8   | C14orf4  | APOD       |
| C16orf52  | GLB1L3   | HOXA2    | ZNF594   | VARS2    | CDH1       |
| EPHA7     | FBXO21   | ACCN1    | ABCA2    | PPP3CC   | SYT2       |
| TMEM156   | DGKD     | FZR1     | SHC3     | PTGIR    | SNCA       |
| PDE6B     | WNT5A    | NSUN7    | CPT1C    | CYP27C1  | KISS1      |
| GKN2      | EFNA3    | C2orf54  | MARCH4   | IMMP2L   | RNF40      |
| EGFR      | ELOVL4   | CDC42BPB | SLC20A2  | ACLY     | CENPN      |
| LOC400657 | PSORS1C1 | NSMCE1   | DOK2     | ALOX12   | FLJ33360   |
| PKNOX2    | CD79A    | CCDC42   | MPDZ     | MGC29506 | RGL1       |
| FGF23     | STK39    | SLC22A17 | DCAF12   | ZAK      | CMPK1      |
| PEBP4     | CORO1A   | KCTD1    | GUCY2D   | FOSL2    | NINJ1      |
| TRMT1     | PSMB9    | SATB1    | SSH2     | C1orf173 | PLCG2      |
| NODAL     | C11orf24 | THAP4    | KIAA0020 | ARHGAP23 | TACC2      |
| IL21R     | CCDC12   | HS3ST4   | FOXB2    | DHRS11   | NAA40      |
| MICALL1   | GOLGA3   | RAVER2   | ZNF703   | KCTD3    | SLC39A11   |
| TMEM18    | SLC13A3  | PUM1     | KEL      | GF11     | LOC1001909 |
| OSR1      | CNRIP1   | MYOF     | HUNK     | ASCL4    | TFPI       |
| PTPRCAP   | ZNF438   | BAI3     | TPRKB    | RFC1     | GTF3C1     |
| LAG3      | GATA4    | ADRA2A   | PADI4    | SMAD3    | RFX1       |
| INPP5F    | SPATA2L  | BAK1     | KRT7     | ATP6V1H  | MTIF2      |
| EIF4G1    | TPM4     | C10orf11 | GRIN3A   | KCNH4    | RARRES2    |
| RAB5C     | FLJ42709 | C2orf55  | PKLR     | UBE2QL1  | MOXD1      |
| SMTN      | CYB5R4   | SMYD2    | FAM105B  | INHBB    | SIDT1      |
| RGL3      | GNAQ     | KIAA0495 | C2orf73  | CDRT4    | CLEC18B    |
| ZBTB24    | ABCB6    | LMOD2    | C6orf132 | NIPA1    | UNKL       |
| CPAMD8    | AQP2     | SPTBN4   | CDH22    | C6orf186 | C12orf42   |

|          |          |         |           |         |        |
|----------|----------|---------|-----------|---------|--------|
| E2F6     | BCAR1    | TRAK1   | TNFRSF13C | PDE4DIP | ELOVL2 |
| TMEM132E | C1orf93  | TBR1    | WNK4      | ZFP64   | TESC   |
| TCFL5    | C14orf23 | DYNC1I2 | RASGEF1A  | EN2     | BEND4  |

---
